# Supplementary material for: l-Methionine supplementation attenuates high-fat fructose diet-induced non-alcoholic steatohepatitis by modulating lipid metabolism, fibrosis, and inflammation in rats
Source: Royal Society of Chemistry journal article supplement (doi:10.1039/d1fo03403k), 2022-01-01
Supplement: d1fo03403k1.pdf [file d1fo03403k1.pdf]

**Table S1: Composition of High-fat diet**

| <b>Ingredients</b>      | <b>Methionine-sufficient HFD (g/kg)</b> | <b>HFD diet supplemented with low-dose L-methionine (g/kg)</b> | <b>HFD diet supplemented with high-dose L-methionine (g/kg)</b> |
|-------------------------|-----------------------------------------|----------------------------------------------------------------|-----------------------------------------------------------------|
| Powdered NPD            | 365                                     | 365                                                            | 365                                                             |
| Lard                    | 310                                     | 310                                                            | 310                                                             |
| Casein                  | 250                                     | 250                                                            | 250                                                             |
| Cholesterol             | 10                                      | 10                                                             | 10                                                              |
| Vitamin and mineral mix | 60                                      | 60                                                             | 60                                                              |
| L-methionine            | <b>04</b>                               | <b>8.5</b>                                                     | <b>13</b>                                                       |
| Yeast powder            | 01                                      | 01                                                             | 01                                                              |
| Sodium chloride         | 01                                      | 01                                                             | 01                                                              |

**Table S2: List of primers used for qRT-PCR**

| <b>Sr.no</b>                 | <b>Gene Name</b> |         | <b>Primer sequence 5'-----3'</b> | <b>Gene Accession No.</b> |
|------------------------------|------------------|---------|----------------------------------|---------------------------|
| <b>Sequences for qRT-PCR</b> |                  |         |                                  |                           |
| 1.                           | Fasn             | Forward | TCGACTTCAAAGGACCCAGC             | NM_017332.1               |
|                              |                  | Reverse | GGCAATACCCGTTCCCTGAA             |                           |
| 2.                           | 18S rRNA         | Forward | GCAATTATTCCTCATGAACG             | NR_046237.1               |
|                              |                  | Reverse | AGGGCCTCACTAAACCATCC             |                           |
| 3.                           | IL1- $\beta$     | Forward | TGCAGGCTTCGAGATGAACA             | NM_031512.2               |
|                              |                  | Reverse | GTGTGCCGTCCTTCATCACAC            |                           |
| 4.                           | TLR4             | Forward | TCAAGCCCAAGCCTTTCAGG             | NM_019178.1               |
|                              |                  | Reverse | AGTCCTTCCATGACAGAACGG            |                           |
| 5.                           | TNF- $\alpha$    | Forward | CGTCAGCCGATTTGCCATTT             | NM_012675.3               |
|                              |                  | Reverse | CTCCAAAGTAGACCTGCCCCG            |                           |
| 6.                           | HMGCR            | Forward | CAGGGAACATGCACCAAGAAGG           | NM_013134.2               |
|                              |                  | Reverse | ATACGGCACGGAAAGAACCATAGT         |                           |
