# Supplementary figures and images for: l-Methionine supplementation attenuates high-fat fructose diet-induced non-alcoholic steatohepatitis by modulating lipid metabolism, fibrosis, and inflammation in rats
Source: Royal Society of Chemistry journal article supplement (doi:10.1039/d1fo03403k), 2022-01-01

## Original Blot (X-Ray Images)

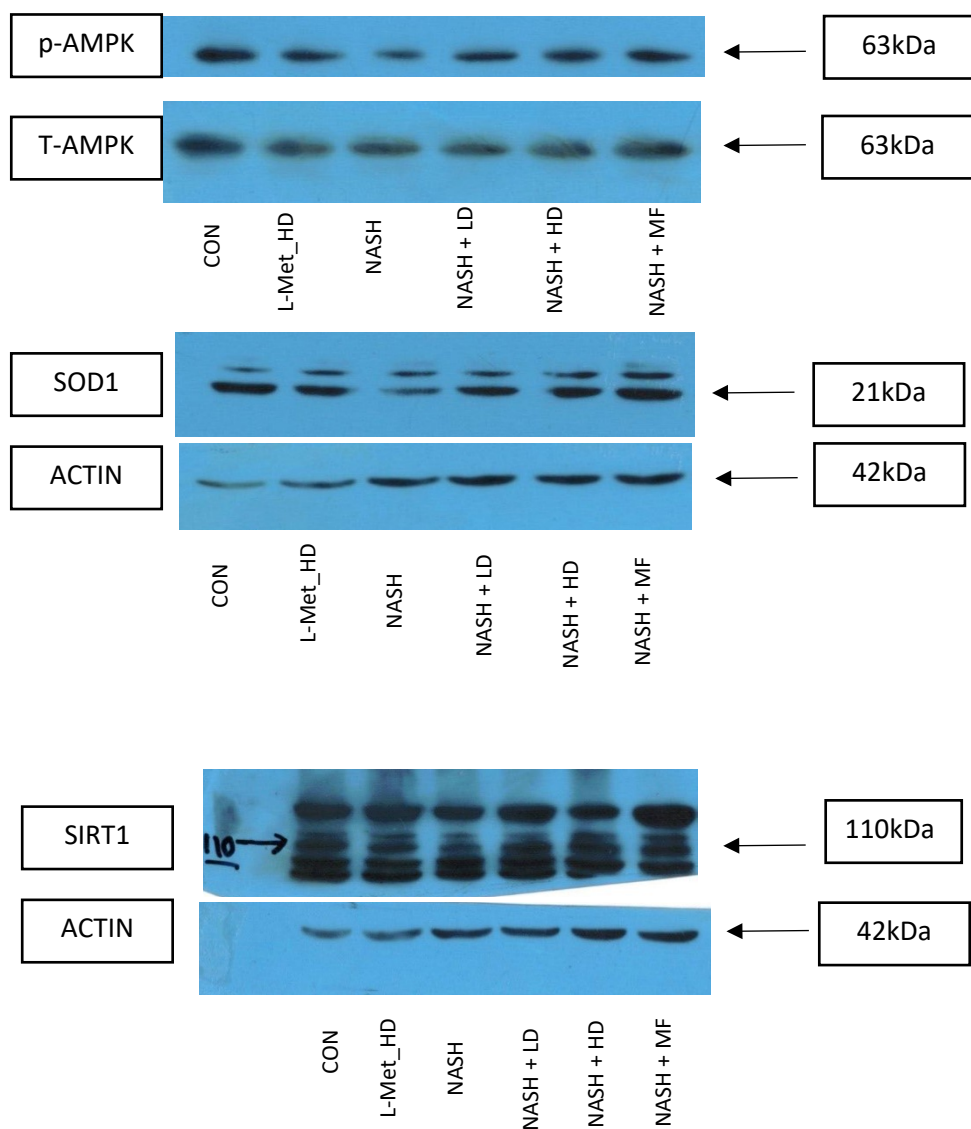

Supplement: d1fo03403k2.pdf [file d1fo03403k2.pdf]
